# Supplementary material
Source: PubMed Central journal article supplement (PMC4010091)
Supplement: NIHMS529252-supplement-All_Supplemental_tables.pdf [file NIHMS529252-supplement-All_Supplemental_tables.pdf]

## eAppendix

The principle components factor analysis with oblique (promax) rotation yielded a two-factor solution representing the domains of physical and sexual abuse (see Table 1A). The number of factors retained was based on scree plots and factors with an eigenvalue >1 per the Kaiser criteria. Items with factor loadings > 0.45 were assigned to the factor for which they had the greatest loading. For the childhood exposures and teen exposures the total percent variances explained by the two-factor solutions were 56% and 58%, respectively.

**eTable 1. Factor Analysis Results**

| <b>Childhood Exposures</b>                                                           |                 |                 |
|--------------------------------------------------------------------------------------|-----------------|-----------------|
|                                                                                      | <b>Factor 1</b> | <b>Factor 2</b> |
| <b>Factor Loadings (promax rotation)</b>                                             |                 |                 |
| Push, Grab, or Shove                                                                 | <b>.71*</b>     | -.04            |
| Kick, Bite, or Punch                                                                 | <b>.74*</b>     | -.04            |
| Hit With Something that Hurt                                                         | <b>.65*</b>     | -.04            |
| Choke or Burn                                                                        | <b>.51*</b>     | .10             |
| Physically Attack in Other Way                                                       | <b>.66*</b>     | .14             |
| Childhood rape                                                                       | .02             | <b>.84*</b>     |
| Childhood sexual touching                                                            | -.03            | <b>.85*</b>     |
| <b>Eigenvalue</b>                                                                    | 2.61            | 1.30            |
| <b>Variance Explained by each factor eliminating other Factors (promax rotation)</b> | 2.18            | 1.45            |
| <b>Proportion of Variance explained</b>                                              | 37%             | 19%             |
| <b>Total Variance explained</b>                                                      |                 | 56%             |
|                                                                                      |                 |                 |
| <b>Teen/Adolescent Exposures</b>                                                     |                 |                 |
|                                                                                      | <b>Factor 1</b> | <b>Factor 2</b> |
| <b>Factor Loadings (promax rotation)</b>                                             |                 |                 |
| Push, Grab, or Shove                                                                 | <b>.76*</b>     | -.01            |
| Kick, Bite, or Punch                                                                 | <b>.78*</b>     | -.05            |
| Hit With Something that Hurt                                                         | <b>.74*</b>     | 0               |
| Choke or Burn                                                                        | <b>.53*</b>     | -.04            |
| Physically Attack in Other Way                                                       | <b>.68*</b>     | .14             |
| Childhood rape                                                                       | .02             | <b>.87*</b>     |
| Childhood sexual touching                                                            | -.03            | <b>.88*</b>     |
| <b>Eigenvalue</b>                                                                    | 2.73            | 1.33            |
| <b>Variance Explained by each factor eliminating other Factors (promax rotation)</b> | 2.32            | 1.45            |
| <b>Proportion of Variance explained</b>                                              | 39%             | 19%             |
| <b>Total Variance explained</b>                                                      |                 | 58%             |

Categories that classify violence exposure by severity and chronicity were based on the factor analysis and frequency trends within each factor (see Table 2A). Physical abuse was classified by severity categories which incorporated both type of violence exposure and frequency of abuse. Sexual abuse was classified based on type of abuse and number of developmental periods that abuse was experienced (chronicity). Our cumulative violence measure merged both physical and sexual abuse.

**eTable 2. Violence Exposure Categorization**

| <b>Severity Categories for Physical Abuse</b> |                                                                                                         | <b>Categories for Sexual Abuse</b>                           | <b>Cumulative Violence Measure</b>            |                                                                                                                                                                                                                                                                                       |
|-----------------------------------------------|---------------------------------------------------------------------------------------------------------|--------------------------------------------------------------|-----------------------------------------------|---------------------------------------------------------------------------------------------------------------------------------------------------------------------------------------------------------------------------------------------------------------------------------------|
| <b>Physical Abuse</b>                         |                                                                                                         | <b>Sexual abuse</b>                                          |                                               |                                                                                                                                                                                                                                                                                       |
| <b>Mild</b>                                   | Kicking, biting, or hitting once<br>Any frequency of pushing                                            | Sexual touching                                              | <b>Mild/Moderate Single Type</b>              | During one developmental period:<br>*Mild/moderate physical abuse only or<br>*Sexual touching only                                                                                                                                                                                    |
| <b>Moderate</b>                               | Physically attacked once<br>Hit a few times or more                                                     | Forced sexual activity during one developmental period       | <b>Mild-Multiple or Severe-Single Type(s)</b> | During one developmental period:<br>*Mild/moderate physical abuse and sexual touching or<br>*Forced sexual activity during one period only or<br>*Severe Physical abuse only                                                                                                          |
| <b>Severe</b>                                 | Choked or burned ever<br>Physically attacked more than once<br>Kicked, pushed, or bitten more than once | Forced sexual activity during multiple developmental periods | <b>Moderate-Chronic or -Multiple Types</b>    | During one developmental period:<br>*Severe physical abuse and sexual touching or<br>*Mild/moderate physical and Forced sexual activity during one period<br>During both developmental periods:<br>*Severe physical abuse only or<br>* Forced sexual activity during multiple periods |
|                                               |                                                                                                         |                                                              | <b>Severe-Chronic or -Multiple Types</b>      | During one developmental period:<br>*Severe physical and Forced sexual activity during one period<br>During both developmental periods:<br>*Severe physical abuse and sexual touching<br>* Forced sexual activity during multiple periods and mild/moderate physical abuse            |
|                                               |                                                                                                         |                                                              | <b>Severe Chronic and Multiple Types</b>      | Both severe physical and forced sexual activity during one or multiple period(s) with one or both exposures occurring during both developmental periods                                                                                                                               |

**eTable 3. Multivariate Cox proportional hazard models for the incident rate ratio of ultrasound- or hysterectomy-confirmed uterine leiomyomata among premenopausal women according to exposure to sexual or physical abuse in childhood and/or adolescence by emotional neglect in childhood: Nurse's Health Study II (1989-2005)\***

|                                         | Very Often, or Always Special in Childhood |              |                          | Never, Rarely, Sometimes Special in Childhood |              |                          |
|-----------------------------------------|--------------------------------------------|--------------|--------------------------|-----------------------------------------------|--------------|--------------------------|
| <b>Cumulative Abuse History</b>         | <b>Person-years</b>                        | <b>Cases</b> | <b>IRR (95% CI)</b>      | <b>Person-years</b>                           | <b>Cases</b> | <b>IRR (95% CI)</b>      |
| No exposure to violence                 | 246,904                                    | 3036         | 1.00 ( <i>referent</i> ) | 14,895                                        | 174          | 1.00 ( <i>referent</i> ) |
| Mild/Moderate Single Type               | 241,474                                    | 3209         | 1.07 (1.02 – 1.12)       | 31,055                                        | 439          | 1.23 (1.03 – 1.48)       |
| Mild Multiple or Severe Single Type(s)  | 90,243                                     | 1356         | 1.16 (1.09 – 1.24)       | 18,409                                        | 291          | 1.35 (1.11 – 1.64)       |
| Moderate: Chronic or Multiple Types     | 39,823                                     | 642          | 1.23 (1.13 – 1.34)       | 13,458                                        | 213          | 1.35 (1.09 – 1.65)       |
| Severe: Chronic or Multiple Types       | 13,747                                     | 222          | 1.19 (1.04 – 1.37)       | 5949                                          | 111          | 1.52 (1.19 – 1.95)       |
| Severe Chronic and Multiple Types       | 6697                                       | 119          | 1.24 (1.03 – 1.50)       | 5387                                          | 110          | 1.70 (1.32 – 2.18)       |
| <b>Abuse Severity</b>                   |                                            |              |                          |                                               |              |                          |
| Severity of Physical Abuse              |                                            |              |                          |                                               |              |                          |
| None                                    | 325,155                                    | 4121         | 1.00                     | 22,277                                        | 281          | 1.00                     |
| Mild                                    | 121,575                                    | 1638         | 1.07 (1.01 – 1.13)       | 15,381                                        | 231          | 1.22 (1.02 – 1.46)       |
| Moderate                                | 154,511                                    | 2220         | 1.09 (1.03 – 1.15)       | 32,122                                        | 485          | 1.16 (1.00 – 1.36)       |
| Severe                                  | 37,647                                     | 605          | 1.14 (1.04 – 1.25)       | 19,373                                        | 335          | 1.28 (1.08 – 1.51)       |
| Severity of Sexual Abuse                |                                            |              |                          |                                               |              |                          |
| None                                    | 445,976                                    | 5696         | 1.00                     | 48,953                                        | 658          | 1.00                     |
| Sexual Touching as Child or Teen        | 135,138                                    | 1980         | 1.08 (1.02 – 1.14)       | 22,599                                        | 363          | 1.14 (1.00 – 1.31)       |
| Forced Sexual Activity as Child or Teen | 45,932                                     | 709          | 1.11 (1.03 – 1.20)       | 12,083                                        | 207          | 1.19 (1.01 – 1.41)       |
| Forced Sexual Activity as Child & Teen  | 11,842                                     | 199          | 1.12 (0.97 – 1.29)       | 5516                                          | 110          | 1.31 (1.05 – 1.63)       |
| <b>Type of Abuse</b>                    |                                            |              |                          |                                               |              |                          |
| None                                    | 246,904                                    | 3036         | 1.00                     | 14,895                                        | 174          | 1.00                     |
| Physical abuse only                     | 199,072                                    | 2660         | 1.08 (1.03 – 1.14)       | 34,059                                        | 484          | 1.24 (1.04 – 1.49)       |
| Sexual Abuse only                       | 78,251                                     | 1085         | 1.08 (1.00 – 1.15)       | 7383                                          | 107          | 1.25 (0.97 – 1.60)       |
| Physical and sexual abuse               | 114,661                                    | 1803         | 1.20 (1.13 – 1.27)       | 32,816                                        | 573          | 1.46 (1.22 – 1.74)       |

\*Models control for all covariates in the fully adjusted multivariate model (Table 3, Model #3)

**eTable 4. Prospective analysis of Incidence rate ratios of ultrasound- or hysterectomy-confirmed uterine leiomyomata among premenopausal women according to severity, chronicity, and type of violence exposure in childhood or adolescence following completion of the 2001 violence questionnaire: Nurse's Health Study II (2001-2005) based on 123,699 woman-years**

| Characteristics                         | No. Woman-Years | No. Cases | Model 1 <sup>a</sup> | Model 2 <sup>b</sup> | Model 3 <sup>c</sup> |
|-----------------------------------------|-----------------|-----------|----------------------|----------------------|----------------------|
| <b>Cumulative Abuse History</b>         |                 |           |                      |                      |                      |
| No exposure to violence <sup>d</sup>    | 45,626          | 1661      | 1.00                 | 1.00                 | 1.00                 |
| Mild/Moderate Single Type               | 46,348          | 752       | 0.95 (0.87 –1.07)    | 0.96 (0.87 –1.06)    | 0.95 (0.86 –1.05)    |
| Mild-Multiple or Severe-Single Type(s)  | 18,191          | 346       | 1.12 (0.98 –1.27)    | 1.09 (0.95 –1.24)    | 1.07 (0.94 –1.22)    |
| Moderate-Chronic or -Multiple Types     | 8677            | 185       | 1.25 (1.06 –1.47)    | 1.19 (1.02 –1.41)    | 1.18 (1.00 –1.39)    |
| Severe-Chronic or -Multiple Types       | 3049            | 65        | 1.25 (0.97 –1.62)    | 1.16 (0.90 –1.50)    | 1.15 (0.89 –1.49)    |
| Severe Chronic and Multiple Types       | 1808            | 35        | 1.09 (0.77 –1.54)    | 1.00 (0.71 –1.41)    | 0.96 (0.68 –1.35)    |
| <b>Childhood Trauma Scale Score</b>     |                 |           |                      |                      |                      |
| 0-5 <sup>d</sup>                        | 14,165          | 226       | 1.00                 | 1.00                 | 1.00                 |
| 6-10                                    | 68,606          | 1146      | 1.05 (0.91 –1.21)    | 1.05 (0.91 –1.21)    | 1.04 (0.90 –1.20)    |
| 11-15                                   | 27,649          | 477       | 1.08 (0.92 –1.27)    | 1.06 (0.90 –1.24)    | 1.04 (0.89 –1.22)    |
| 16-20                                   | 9879            | 220       | 1.38 (1.14 –1.66)    | 1.38 (1.10 –1.61)    | 1.31 (1.08 –1.59)    |
| 21-25                                   | 3400            | 72        | 1.29 (0.99 –1.68)    | 1.29 (0.92 –1.57)    | 1.17 (0.89 –1.52)    |
| <b>Abuse Severity<sup>e</sup></b>       |                 |           |                      |                      |                      |
| Severity of Physical Abuse              |                 |           |                      |                      |                      |
| None <sup>d</sup>                       | 56,798          | 1006      | 1.00                 | 1.00                 | 1.00                 |
| Mild                                    | 23,491          | 402       | 1.00 (0.89 –1.12)    | 1.00 (0.89 –1.13)    | 1.00 (0.89 –1.12)    |
| Moderate                                | 31,338          | 572       | 1.04 (0.93 –1.15)    | 1.03 (0.92 –1.14)    | 1.02 (0.92 –1.13)    |
| Severe                                  | 9072            | 161       | 0.95 (0.80 –1.13)    | 0.92 (0.77 –1.09)    | 0.91 (0.76 –1.08)    |
| Frequency of Sexual Abuse               |                 |           |                      |                      |                      |
| None <sup>d</sup>                       | 85,415          | 1395      | 1.00                 | 1.00                 | 1.00                 |
| Sexual Touching as Child or Teen        | 26,153          | 494       | 1.14 (1.02 –1.26)    | 1.11 (1.00 –1.23)    | 1.10 (1.00 –1.22)    |
| Forced Sexual Activity as Child or Teen | 9492            | 191       | 1.22 (1.05 –1.42)    | 1.17 (1.00 –1.36)    | 1.16 (1.00 –1.35)    |
| Forced Sexual Activity as Child & Teen  | 2639            | 61        | 1.37 (1.05 –1.78)    | 1.29 (0.99 –1.68)    | 1.27 (0.97 –1.65)    |
| <b>Type of Abuse<sup>e</sup></b>        |                 |           |                      |                      |                      |
| None <sup>d</sup>                       | 45,626          | 758       | 1.00                 | 1.00                 | 1.00                 |
| Physical abuse only                     | 39,789          | 637       | 0.95 (0.86 –1.06)    | 0.95 (0.85 –1.05)    | 0.94 (0.85 –1.05)    |
| Sexual Abuse only                       | 14,172          | 248       | 1.04 (0.90 –1.20)    | 1.02 (0.87 –1.17)    | 1.00 (0.87 –1.16)    |
| Physical and sexual abuse               | 24,112          | 498       | 1.21 (1.08 –1.35)    | 1.16 (1.03 –1.30)    | 1.14 (1.02 –1.28)    |

<sup>a</sup>Model 1 controls for age, parental education, and race/ethnicity

<sup>b</sup>Model 2 controls for all variables in Model 1 and parity (1, 2, ≥3 pregnancies >6 months); age of menarche (≤10, 11, 12, 13, 14,15,16, ≥17 years of age); age of first oral contraceptive use (never, 13-16, 17-20, 21-24 years); age of first birth (≤22, 23-25, ≥25 years of age); time since last birth (1-7, 8-15, ≥16 years); history of infertility (yes, no); menstrual irregularity (regular, somewhat irregular or 21-30 day cycle, very irregular >40 day cycle).

<sup>c</sup>Model 3 controls for all variables in Model 2 and BMI (continuous); diastolic blood pressure (continuous).

<sup>d</sup>Reference category; <sup>e</sup>Models mutually adjust for physical and sexual abuse.
